# Supplementary material for: The emergence, maintenance, and demise of diversity in a spatially variable antibiotic regime
Source: PubMed Central journal article supplement (PMC6121846; doi:10.1002/evl3.43), 2018-03-17

**Change in resistance frequency**

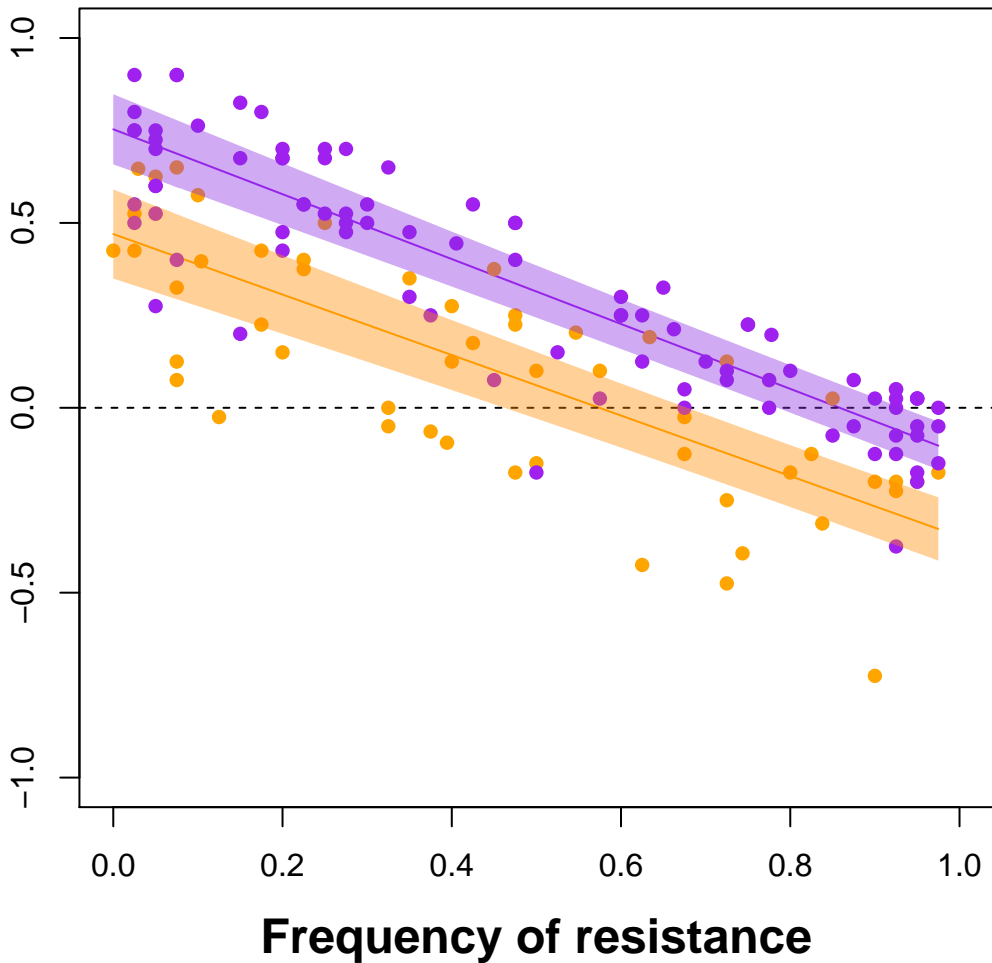

Supplement: EVL3-2-134-s007.pdf [file EVL3-2-134-s007.pdf]
